# Supplementary material
Source: PubMed Central journal article supplement (PMC5215745)
Supplement: NIHMS822009-supplement-Online_Supplement.pdf [file NIHMS822009-supplement-Online_Supplement.pdf]

## SUPPLEMENTAL MATERIAL

### EXPANDED STATISITCAL METHODS

Associations with PM<sub>2.5</sub> exposures and microparticles and markers of inflammation were evaluated by estimating two similar regression models. The first model used a fixed effects regression approach that controls for subject-specific differences by estimating a fixed effects model as follows:

$$Y_{it} = \alpha_1 + \alpha_2 + \dots + \alpha_{72} + \beta(P_t) + \varepsilon_{it}$$

where  $Y_{it}$  is the outcome variable for individual  $i$  on day  $t$ ;  $\alpha_1 + \alpha_2 + \dots + \alpha_{72}$  are the fixed effects coefficients that adjust for subject-specific differences;  $\beta$  is the coefficient that measures the association between PM<sub>2.5</sub> and the outcome variable,  $P_t$  is PM<sub>2.5</sub> averaged over the 24 h period prior to the blood draw on day  $t$ ; and  $\varepsilon_{it}$  is the model error. The second model uses a subject-mean adjusted approach that accounts for subject-specific differences by subtracting out subject-level means as follows:

$$\Delta Y_{it} = (Y_{it} - \bar{Y}_i)_{it} = \alpha + \beta(P_t) + \varepsilon_{it}$$

where  $\bar{Y}_i$  is the mean value for individual  $i$ . The difference between the two models is that the fixed effects model controls for subject-level differences by estimating subject-specific fixed effects as part of the model. The subject-mean adjusted model controls for subject-level differences by first subtracting out the subject-level means, and regressing deviations from these means ( $\Delta Y_{it}$ ) on PM<sub>2.5</sub>.

To illustrate associations, plots of the subject-specific differences over pollution concentrations along with regression plots were generated. To explore the sensitivity of the results, models were estimated that excluded observations from any participant who reported any acute illness at time of the blood draw, models that controlled for time exercised on the day of the draw and the day before the draw, models that controlled for whether or not female subjects were menstruating, and models that excluded observations for days with PM<sub>2.5</sub> concentrations greater than 100  $\mu\text{g}/\text{m}^3$ . Additionally, rather than using PM<sub>2.5</sub> concentrations 24 h prior to the blood draws, models that used PM<sub>2.5</sub> concentrations 12 h and 48 h, respectively, were estimated. Finally, using data for the final two winter/spring time periods, models that included interaction terms for gender and PM<sub>2.5</sub>, and fish oil (versus placebo) and PM<sub>2.5</sub> were estimated to test for effect modification by gender and by fish oil supplement use.

For the 42 analyzed human cytokines and the 2 adhesion proteins, we also estimated the fixed effects and subject-means adjusted models as described above. The percent change (and 95% CIs) for each analyte per 10  $\mu\text{g}/\text{m}^3$  increase in PM<sub>2.5</sub> relative to the mean value of the analyte were calculated and plotted. The results are ordered based on t-values—resulting in the most statistically significant positive associations being on the left. This approach was used in order comprehensively evaluate all of the measures analytes, allow for direct comparisons and evaluation of the strength of the statistical associations with key markers of systemic inflammation, and to mitigate concerns regarding multiple testing and selective reporting.

All of the statistical analyses were conducted using SAS, version 9.4 (SAS Institute, Inc., Cary, North Carolina).

**Supplemental Table I.** Regression coefficients for PM<sub>2.5</sub> from fixed effect and subject-mean adjusted modeling approaches

| Outcome variables                       | Fixed Effect                       |         | Subject-mean adjusted              |         | R <sup>2</sup> |
|-----------------------------------------|------------------------------------|---------|------------------------------------|---------|----------------|
|                                         | Coefficient (x 10)<br>(Std. Error) | P-value | Coefficient (x 10)<br>(Std. Error) | P-value |                |
| <b>Microparticles</b>                   |                                    |         |                                    |         |                |
| MP, EPC                                 | -0.12 (0.45)                       | 0.787   | -0.09 (0.34)                       | 0.796   | 0.00           |
| MP, Platelet                            | -1.85 (0.73)                       | 0.012   | -1.33 (0.55)                       | 0.017   | 0.02           |
| MP, Endothelial                         | 1.39 (0.20)                        | <0.001  | 1.00 (0.16)                        | <0.001  | 0.11           |
| MP, Lung Endothelial                    | 0.58 (0.09)                        | <0.001  | 0.42 (0.07)                        | <0.001  | 0.10           |
| MP, Non-lung Endothelial                | 0.79 (0.13)                        | <0.001  | 0.56 (0.10)                        | <0.001  | 0.09           |
| MP, Venous Endothelial                  | 0.67 (0.11)                        | <0.001  | 0.48 (0.09)                        | <0.001  | 0.09           |
| MP, Lung Venous Endothelial             | 0.54 (0.09)                        | <0.001  | 0.39 (0.07)                        | <0.001  | 0.08           |
| MP, Arterial Endothelial                | 0.51 (0.1)                         | <0.001  | 0.37 (0.07)                        | <0.001  | 0.07           |
| MP, Lung Arterial Endothelial           | 0.43 (0.09)                        | <0.001  | 0.31 (0.07)                        | <0.001  | 0.06           |
| MP, Activated Endothelial               | -0.88 (0.34)                       | 0.010   | -0.63 (0.26)                       | 0.014   | 0.02           |
| MP, Lung Activated Endothelial          | 0.006 (0.09)                       | 0.940   | 0.005 (0.06)                       | 0.943   | 0.00           |
| MP, Venous Activated Endothelial        | -0.02 (0.14)                       | 0.871   | -0.02 (0.10)                       | 0.876   | 0.00           |
| MP, Lung Venous Activated Endothelial   | -0.002 (0.08)                      | 0.979   | -0.002 (0.06)                      | 0.980   | 0.00           |
| MP, Arterial Activated Endothelial      | 0.04 (0.11)                        | 0.690   | 0.03 (0.08)                        | 0.702   | 0.00           |
| MP, Lung Arterial Activated Endothelial | 0.07 (0.10)                        | 0.501   | 0.05 (0.07)                        | 0.518   | 0.00           |
| <b>Immune cells</b>                     |                                    |         |                                    |         |                |
| Monocytes                               | 1063.78 (228.46)                   | <0.001  | 863.99 (185.95)                    | <0.001  | 0.06           |
| Natural killer cells                    | 812.89 (224.51)                    | <0.001  | 660.22 (182.24)                    | <0.001  | 0.03           |
| Helper T cells                          | 2649.31 (620.36)                   | <0.001  | 2151.75 (504.36)                   | <0.001  | 0.05           |
| Killer T cells                          | 1278.28 (398.93)                   | 0.002   | 1038.21 (323.52)                   | 0.001   | 0.03           |
| B cells                                 | -382.57 (376.38)                   | 0.310   | -310.72 (304.33)                   | 0.308   | 0.00           |
| Platelet-monocyte aggregates            | 0.25 (0.11)                        | 0.019   | 0.20 (0.09)                        | 0.020   | 0.01           |

**Supplemental Table II.** Summary statistics and regression coefficients (and standard errors) for PM<sub>2.5</sub> from subject-mean adjusted regression results for all measured cytokines and adhesion molecules with out-of-range observations imputed using the florescent intensity and the relevant minimum or maximum values of the standard curve as recommended.

| Analyte        | N of Obs. | Mean      | SD       | Fixed Effects Estimate | P-value | Subject Mean Estimate | P-value | R square |
|----------------|-----------|-----------|----------|------------------------|---------|-----------------------|---------|----------|
| TNF $\alpha$   | 370       | 20.79     | 18.91    | 1.54 (0.23)            | <0.0001 | 1.25 (0.19)           | <0.0001 | 0.1063   |
| sICAM-1        | 370       | 37723.12  | 11579.62 | 771.58 (153.2)         | <0.0001 | 628.43 (125.19)       | <0.0001 | 0.0641   |
| MCP-1          | 370       | 255.7     | 105.67   | 6.41 (1.34)            | <0.0001 | 5.22 (1.09)           | <0.0001 | 0.0583   |
| IL-8           | 370       | 42.42     | 68.69    | 3.63 (0.86)            | <0.0001 | 2.96 (0.7)            | <0.0001 | 0.0464   |
| MIP-1 $\alpha$ | 370       | 24.35     | 30.61    | 1.06 (0.26)            | <0.0001 | 0.86 (0.21)           | <0.0001 | 0.0442   |
| MIP-1 $\beta$  | 370       | 68.95     | 116.06   | 2.02 (0.64)            | 0.0017  | 1.65 (0.52)           | 0.0016  | 0.0266   |
| IP-10          | 370       | 135.17    | 92.6     | 4.97 (1.65)            | 0.0028  | 4.05 (1.34)           | 0.0027  | 0.0242   |
| sVCAM-1        | 370       | 389023.08 | 89651.48 | 2809.7 (1268.56)       | 0.0275  | 2288.44 (1030.08)     | 0.0269  | 0.0132   |
| IL-6           | 370       | 2.45      | 4.92     | 0.11 (0.06)            | 0.0494  | 0.09 (0.05)           | 0.0484  | 0.0105   |
| IL-10          | 370       | 5.05      | 9.17     | 0.14 (0.07)            | 0.0532  | 0.11 (0.06)           | 0.0523  | 0.0102   |
| IL-1 $\beta$   | 370       | 5.7       | 16.12    | 0.35 (0.19)            | 0.0639  | 0.29 (0.15)           | 0.0628  | 0.0094   |
| IL-9           | 370       | 2.39      | 4.47     | 0.03 (0.02)            | 0.1209  | 0.02 (0.01)           | 0.1193  | 0.0066   |
| IL-15          | 370       | 5.38      | 12.96    | 0.08 (0.07)            | 0.2678  | 0.06 (0.06)           | 0.2657  | 0.0034   |
| IL-1RA         | 370       | 109.75    | 248.43   | 1.12 (1.05)            | 0.2837  | 0.92 (0.85)           | 0.2815  | 0.0032   |
| IL-13          | 370       | 33.31     | 67.58    | 0.29 (0.28)            | 0.2876  | 0.24 (0.22)           | 0.2855  | 0.0031   |
| IL-12P70       | 370       | 16.23     | 38.92    | 0.22 (0.22)            | 0.3169  | 0.18 (0.18)           | 0.3147  | 0.0027   |
| G-CSF          | 370       | 29.22     | 84.05    | 0.34 (0.38)            | 0.3806  | 0.27 (0.31)           | 0.3784  | 0.0021   |
| Eotaxin-1      | 370       | 101.6     | 44.54    | 0.31 (0.41)            | 0.4538  | 0.25 (0.33)           | 0.4517  | 0.0015   |
| IL-5           | 370       | 3.19      | 6.6      | 0.01 (0.02)            | 0.5475  | 0.01 (0.02)           | 0.5456  | 0.001    |
| IL-1 $\alpha$  | 370       | 32.2      | 94.66    | 0.43 (0.85)            | 0.6106  | 0.35 (0.69)           | 0.609   | 0.0007   |
| TNF $\beta$    | 370       | 224.79    | 500.19   | 0.95 (2.16)            | 0.6592  | 0.78 (1.75)           | 0.6577  | 0.0005   |
| MCp-3          | 368       | 124.65    | 225.41   | 0.41 (0.99)            | 0.6759  | 0.34 (0.8)            | 0.6743  | 0.0005   |
| IL-12P40       | 370       | 70.62     | 190.82   | 0.32 (0.8)             | 0.69    | 0.26 (0.65)           | 0.6886  | 0.0004   |
| FGF-2          | 370       | 124.34    | 137.68   | 0.36 (1.16)            | 0.7545  | 0.29 (0.94)           | 0.7534  | 0.0003   |
| TGF- $\alpha$  | 370       | 8.23      | 23.9     | 0.04 (0.15)            | 0.8154  | 0.03 (0.12)           | 0.8146  | 0.0001   |
| GM-CSF         | 370       | 25.73     | 55.6     | 0.05 (0.24)            | 0.8507  | 0.04 (0.2)            | 0.85    | <0.0001  |
| IL-17A         | 370       | 8.46      | 13.86    | 0.02 (0.09)            | 0.8507  | 0.01 (0.08)           | 0.85    | <0.0001  |
| Fractalkine    | 370       | 82.53     | 217.07   | 0.14 (1.36)            | 0.9167  | 0.12 (1.11)           | 0.9163  | <0.0001  |
| IL-2           | 370       | 4.76      | 14.34    | 0.01 (0.16)            | 0.9562  | 0.01 (0.13)           | 0.956   | <0.0001  |
| IL-7           | 370       | 1.86      | 3.01     | 0 (0.02)               | 0.957   | 0 (0.02)              | 0.9568  | <0.0001  |
| IFN $\gamma$   | 370       | 29.22     | 77.66    | 0 (0.59)               | 0.9994  | 0 (0.48)              | 0.9994  | <0.0001  |
| IL-4           | 370       | 2.36      | 10.74    | -0.01 (0.06)           | 0.9336  | 0 (0.05)              | 0.9333  | <0.0001  |
| PDGF-BB        | 370       | 18537.05  | 27508.78 | -140.45 (549.09)       | 0.7983  | -114.39 (445.19)      | 0.7974  | 0.0002   |
| Flt-3L         | 370       | 3.58      | 21.98    | -0.15 (0.26)           | 0.5736  | -0.12 (0.21)          | 0.5718  | 0.0009   |
| IL-18          | 370       | 94.8      | 81.4     | -0.47 (0.79)           | 0.554   | -0.38 (0.64)          | 0.5522  | 0.001    |
| MDC            | 370       | 547.14    | 243.61   | -1.97 (2.66)           | 0.4593  | -1.61 (2.16)          | 0.4572  | 0.0015   |
| IFN $\alpha$ 2 | 370       | 74.23     | 181.96   | -1.09 (1.47)           | 0.4585  | -0.89 (1.19)          | 0.4564  | 0.0015   |
| IL-3           | 370       | 1.97      | 6.7      | -0.03 (0.04)           | 0.4532  | -0.03 (0.03)          | 0.4511  | 0.0015   |
| VEGF-A         | 355       | 95.53     | 118.99   | -1.34 (0.93)           | 0.1511  | -1.09 (0.75)          | 0.1478  | 0.0059   |
| GRO $\alpha$   | 370       | 2830.76   | 1317.08  | -31.78 (14.59)         | 0.0302  | -25.89 (11.85)        | 0.0296  | 0.0128   |

|         |     |         |         |                 |         |                 |         |        |
|---------|-----|---------|---------|-----------------|---------|-----------------|---------|--------|
| RANTES  | 370 | 2513.11 | 2784.59 | -143.17 (43.13) | 0.001   | -116.61 (35.09) | 0.001   | 0.0291 |
| PDGF-AA | 370 | 1438.19 | 466.94  | -19.39 (4.96)   | 0.0001  | -15.79 (4.04)   | 0.0001  | 0.0399 |
| sCD40L  | 370 | 1521.46 | 713.2   | -47.38 (8.63)   | <0.0001 | -38.59 (7.07)   | <0.0001 | 0.075  |
| EGF     | 370 | 197.96  | 137.85  | -15.34 (1.93)   | <0.0001 | -12.5 (1.6)     | <0.0001 | 0.1429 |

**Supplemental Table III.** Summary statistics and regression coefficients (and standard errors) for PM<sub>2.5</sub> from all of the measured cytokines and adhesion molecules with out-of-range observations treated as missing observations.

| Analyte       | N of Obs. | Mean      | SD       | Fixed Effects Estimate | P-value | Subject Mean Estimate | P-value | R <sup>2</sup> |
|---------------|-----------|-----------|----------|------------------------|---------|-----------------------|---------|----------------|
| TNF $\alpha$  | 366       | 21.01     | 18.89    | 1.55 (0.23)            | <0.0001 | 1.26 (0.19)           | <0.0001 | 0.1066         |
| sICAM-1       | 370       | 37723.12  | 11579.62 | 771.58 (153.2)         | <0.0001 | 628.43 (125.19)       | <0.0001 | 0.0641         |
| MCP-1         | 370       | 255.7     | 105.67   | 6.41 (1.34)            | <0.0001 | 5.22 (1.09)           | <0.0001 | 0.0583         |
| MIP-1a        | 222       | 40.16     | 30.61    | 1.1 (0.29)             | 0.0002  | 0.81 (0.21)           | 0.0002  | 0.0601         |
| IL-8          | 266       | 58.75     | 74.95    | 3.74 (1.19)            | 0.0019  | 2.64 (0.87)           | 0.0028  | 0.0334         |
| IP-10         | 370       | 135.17    | 92.6     | 4.97 (1.65)            | 0.0028  | 4.05 (1.34)           | 0.0027  | 0.0242         |
| MIP-1 $\beta$ | 287       | 88.7      | 125.03   | 2.06 (0.72)            | 0.0048  | 1.59 (0.56)           | 0.0049  | 0.0274         |
| sVCAM-1       | 370       | 389023.08 | 89651.48 | 2809.7 (1268.56)       | 0.0275  | 2288.44 (1030.08)     | 0.0269  | 0.0132         |
| IL-9          | 370       | 2.39      | 4.47     | 0.03 (0.02)            | 0.1209  | 0.02 (0.01)           | 0.1193  | 0.0066         |
| IL-10         | 179       | 9.76      | 11.45    | 0.21 (0.14)            | 0.13    | 0.16 (0.11)           | 0.122   | 0.0135         |
| IL-6          | 155       | 4.96      | 6.86     | 0.16 (0.12)            | 0.1764  | 0.1 (0.08)            | 0.1982  | 0.0108         |
| IL-1 $\beta$  | 232       | 8.72      | 19.77    | 0.39 (0.32)            | 0.2343  | 0.26 (0.22)           | 0.2512  | 0.0057         |
| IL-13         | 150       | 81.22     | 86.17    | 0.57 (0.53)            | 0.2842  | 0.46 (0.42)           | 0.2776  | 0.0080         |
| IL-1RA        | 161       | 251.39    | 326.49   | 2 (2.21)               | 0.3679  | 1.58 (1.73)           | 0.3636  | 0.0052         |
| IL-15         | 198       | 9.5       | 16.67    | 0.11 (0.14)            | 0.432   | 0.08 (0.1)            | 0.433   | 0.0031         |
| Eotaxin-1     | 370       | 101.6     | 44.54    | 0.31 (0.41)            | 0.4538  | 0.25 (0.33)           | 0.4517  | 0.0015         |
| IL-12P70      | 274       | 21.69     | 43.96    | 0.24 (0.32)            | 0.4478  | 0.17 (0.23)           | 0.454   | 0.0021         |
| G-CSF         | 225       | 47.63     | 103.77   | 0.46 (0.68)            | 0.4929  | 0.33 (0.49)           | 0.4921  | 0.0021         |
| IL-5          | 175       | 6.04      | 8.76     | 0.03 (0.05)            | 0.5587  | 0.02 (0.04)           | 0.5476  | 0.0021         |
| MCp-3         | 139       | 328.95    | 259.93   | 0.91 (1.88)            | 0.6284  | 0.73 (1.49)           | 0.6236  | 0.0018         |
| TNF $\beta$   | 153       | 542.69    | 658.72   | 1.92 (4.15)            | 0.645   | 1.5 (3.24)            | 0.6452  | 0.0014         |
| IL-1 $\alpha$ | 258       | 45.9      | 110.65   | 0.51 (1.17)            | 0.6624  | 0.4 (0.89)            | 0.6525  | 0.0008         |
| IL-12P40      | 182       | 142.9     | 252.77   | 0.38 (1.62)            | 0.8132  | 0.29 (1.23)           | 0.8125  | 0.0003         |
| GM-CSF        | 277       | 34.16     | 62.04    | 0.04 (0.31)            | 0.8982  | 0.03 (0.24)           | 0.8956  | <0.0001        |
| FGF-2         | 306       | 149.68    | 138.6    | 0.1 (1.15)             | 0.9336  | 0.08 (0.89)           | 0.9328  | <0.0001        |
| IL-7          | 140       | 3.85      | 4.19     | 0 (0.05)               | 0.9789  | 0 (0.04)              | 0.9782  | <0.0001        |
| Fractalkine   | 220       | 138.37    | 267.7    | -0.02 (2.5)            | 0.9924  | -0.02 (1.79)          | 0.9923  | <0.0001        |
| TGF- $\alpha$ | 168       | 17.35     | 33.3     | 0 (0.34)               | 0.9907  | 0 (0.25)              | 0.9906  | <0.0001        |
| IL-2          | 202       | 8.19      | 18.74    | -0.03 (0.31)           | 0.9282  | -0.02 (0.22)          | 0.9262  | <0.0001        |
| IFN $\gamma$  | 193       | 55.43     | 100.74   | -0.19 (1.23)           | 0.8792  | -0.13 (0.88)          | 0.8783  | 0.0001         |
| IL-4          | 54        | 12.45     | 26.11    | -0.08 (0.55)           | 0.8797  | -0.06 (0.36)          | 0.874   | 0.0005         |
| IL-17A        | 271       | 11.31     | 15.23    | -0.05 (0.12)           | 0.6486  | -0.04 (0.09)          | 0.6499  | 0.0008         |
| PDGF-BB       | 332       | 19514.18  | 28883.97 | -258.72 (566.73)       | 0.6484  | -204.19 (446.09)      | 0.6474  | 0.0006         |
| IL-18         | 350       | 100.03    | 80.6     | -0.49 (0.84)           | 0.5601  | -0.39 (0.67)          | 0.5594  | 0.0010         |
| MDC           | 370       | 547.14    | 243.61   | -1.97 (2.66)           | 0.4593  | -1.61 (2.16)          | 0.4572  | 0.0015         |
| IL-3          | 370       | 1.97      | 6.7      | -0.03 (0.04)           | 0.4532  | -0.03 (0.03)          | 0.4511  | 0.0015         |

|              |     |         |         |                |         |                |         |        |
|--------------|-----|---------|---------|----------------|---------|----------------|---------|--------|
| IFNa2        | 301 | 91.1    | 197.97  | -1.54 (1.89)   | 0.418   | -1.2 (1.47)    | 0.4134  | 0.0022 |
| Flt-3L       | 8   | 136.71  | 69.01   | -51.81 (48.5)  | 0.3343  | -47.57 (42.82) | 0.3091  | 0.1706 |
| VEGF-A       | 218 | 155.17  | 117.64  | -1.55 (1.19)   | 0.1953  | -1.19 (0.89)   | 0.1804  | 0.0083 |
| GRO $\alpha$ | 370 | 2830.76 | 1317.08 | -31.78 (14.59) | 0.0302  | -25.89 (11.85) | 0.0296  | 0.0128 |
| RANTES       | 350 | 2085.29 | 2191.45 | -92.64 (36.08) | 0.0108  | -73.68 (28.78) | 0.0109  | 0.0185 |
| PDGF-AA      | 370 | 1438.19 | 466.94  | -19.39 (4.96)  | 0.0001  | -15.79 (4.04)  | 0.0001  | 0.0399 |
| sCD40L       | 370 | 1521.46 | 713.2   | -47.38 (8.63)  | <0.0001 | -38.59 (7.07)  | <0.0001 | 0.0750 |
| EGF          | 370 | 197.96  | 137.85  | -15.34 (1.93)  | <0.0001 | -12.5 (1.6)    | <0.0001 | 0.1429 |

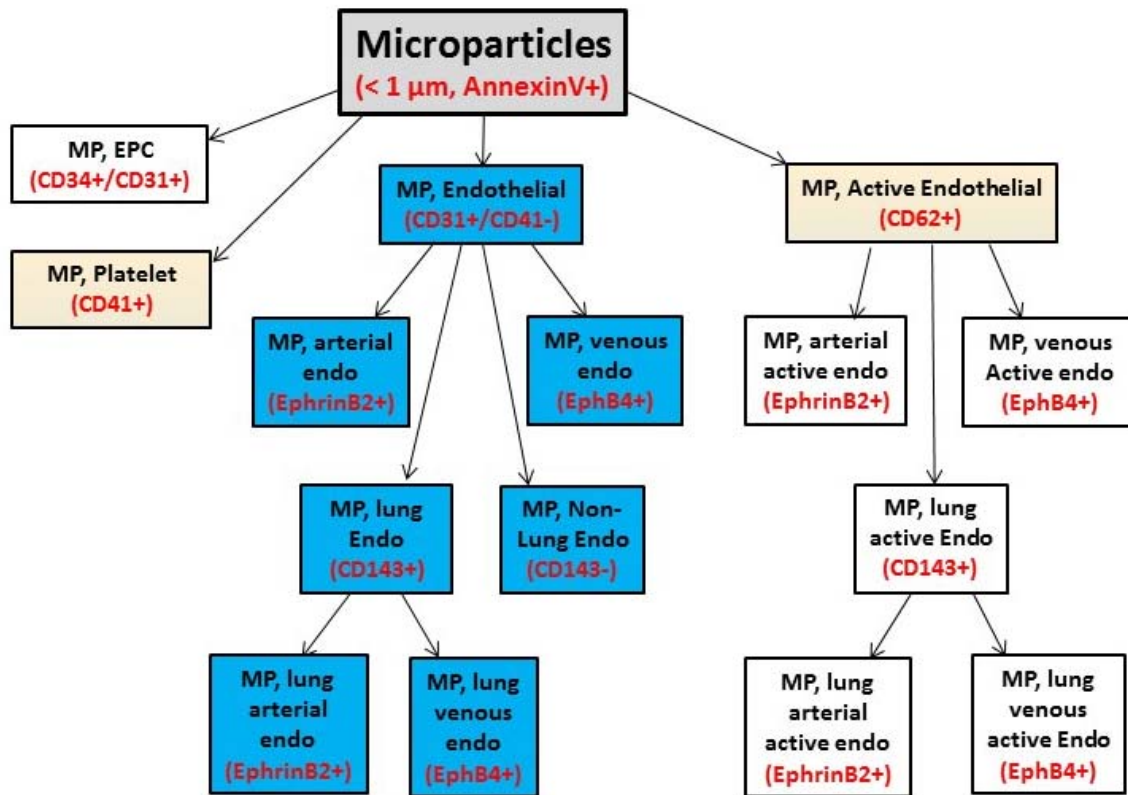

**Supplemental Figure I.** Stylized summary of findings regarding  $PM_{2.5}$  associations with circulating microparticles. The color shading indicates the following: white, not significantly associated with  $PM_{2.5}$ ; blue, positively associated with  $PM_{2.5}$ ; tan, negatively associated with  $PM_{2.5}$ .

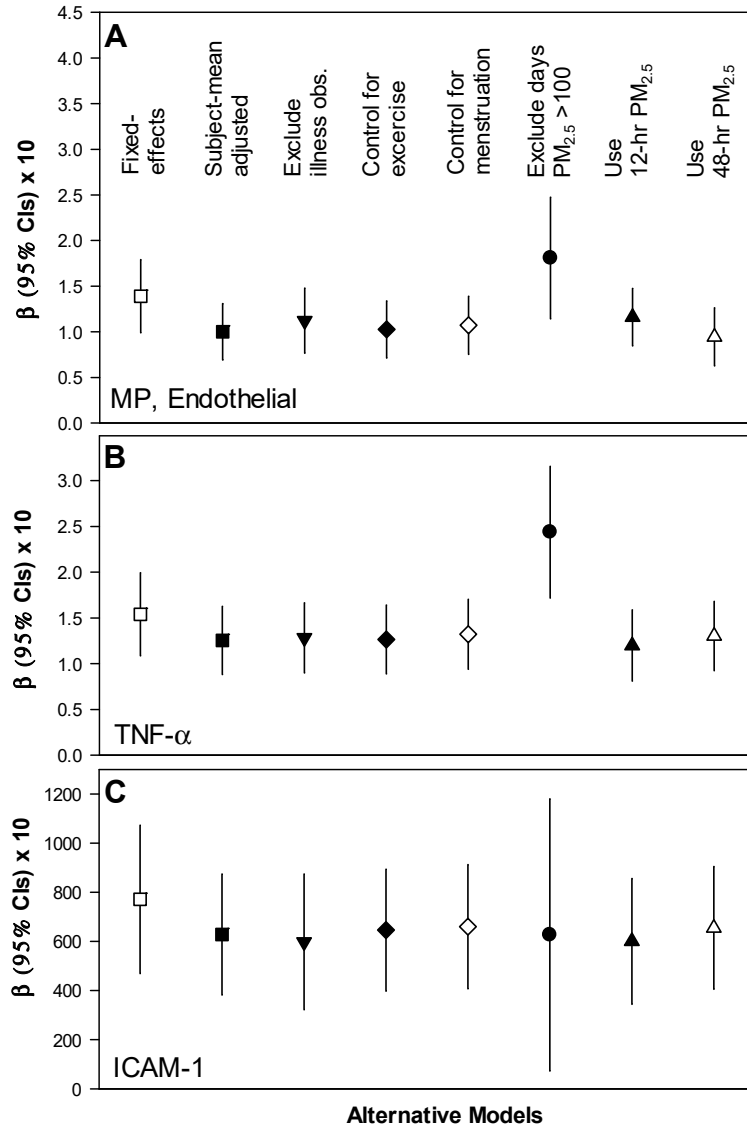

**Supplemental Figure II.** Selected sensitivity analysis. Forrest plot of point estimates and 95% CIs of the coefficient of PM<sub>2.5</sub> (x 10) for endothelial microparticles (Panel A), TNFα (Panel B), and sICAM-1 (Panel C) using various regression models. These models include: fixed-effects and subject-mean adjusted models with all observations; subject-mean adjusted models excluding draws from participants who reported illness; models controlling for concurrent and previous days' time exercising; models controlling for menstruation; models that exclude days with PM<sub>2.5</sub> concentrations greater than 100 μg/m<sup>3</sup>; and models that used PM<sub>2.5</sub> concentrations 12 h and 48 h prior to blood draws (rather than 24 h).
